# Supplementary material for: Poly(vinylidene fluoride)-functionalized single-walled carbon nanotubes for the preparation of composites with improved conductivity
Source: Royal Society of Chemistry journal article supplement (doi:10.1039/c2py20166f), 2012-01-01
Supplement: c2py20166f.pdf [file c2py20166f.pdf]

## Supplemental Material

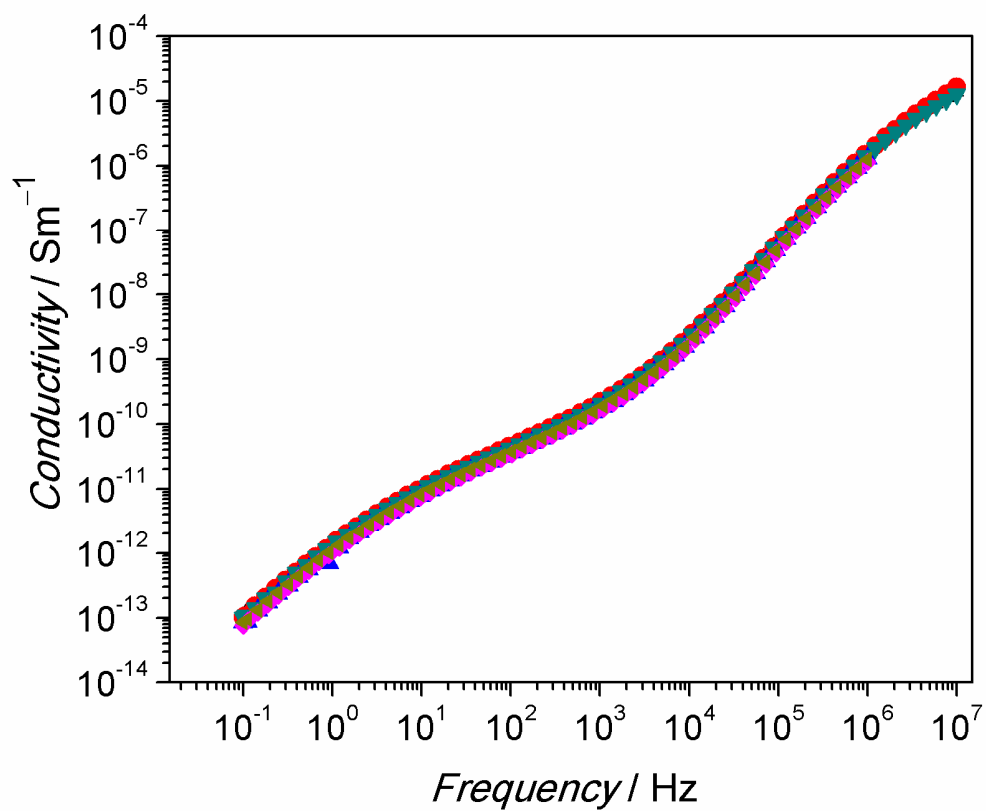

Figure S1: Conductivity as a function of frequency for PVDF containing 0.1 and 1.0 wt % of pristine SWCNTs as well as 0.05, 0.1 and 0.25 wt % of PVDF-functionalized SWCNTs.
